# Supplementary material for: Synthesis of sulfide solid electrolytes from Li2S and P2S5 in anisole
Source: Royal Society of Chemistry journal article supplement (doi:10.1039/d0ta08658d), 2020-12-10
Supplement: d0ta08658d1.pdf [file d0ta08658d1.pdf]

## Supplementary Information

### Synthesis of Sulfide Solid Electrolytes from $\text{Li}_2\text{S}$ and $\text{P}_2\text{S}_5$ in Anisole

Riku Maniwa<sup>a</sup>, Marcela Calpa<sup>a,b</sup>, Nataly Carolina Rosero-Navarro<sup>b\*</sup>, Akira Miura<sup>b\*</sup>, and

Kiyoharu Tadanaga<sup>b</sup>

<sup>a</sup> Graduate School of Chemical Sciences and Engineering, Hokkaido University, Sapporo,

Hokkaido 060-8628, Japan

<sup>b</sup> Division of Applied Chemistry, Faculty of Engineering, Hokkaido University, Sapporo,

Hokkaido 060-8628, Japan

\* Corresponding author

E-mail address: [amiura@eng.hokudai.ac.jp](mailto:amiura@eng.hokudai.ac.jp); [rosero@eng.hokudai.ac.jp](mailto:rosero@eng.hokudai.ac.jp)

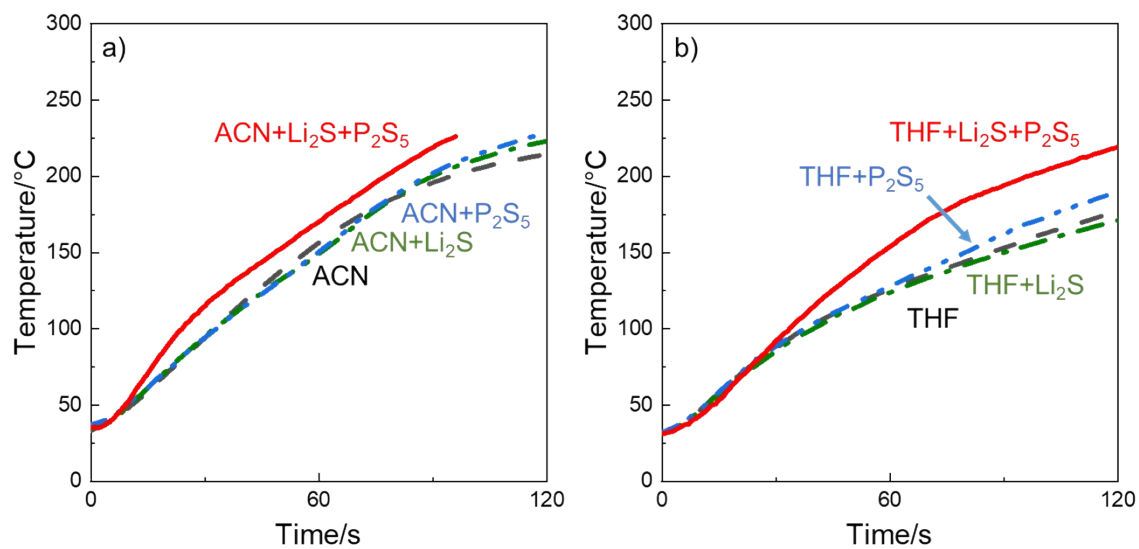

Figure S1. The temperature change during microwave irradiation a) in ACN b) in THF. The output power of microwave was 100 W.

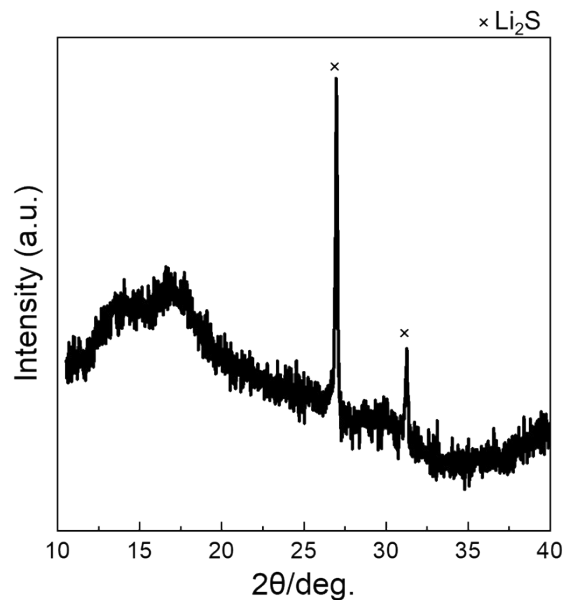

Figure S2. The XRD pattern of the precipitation of suspension (Li<sub>2</sub>S:Lawesson's reagents = 75:25) using anisole after microwave irradiation.

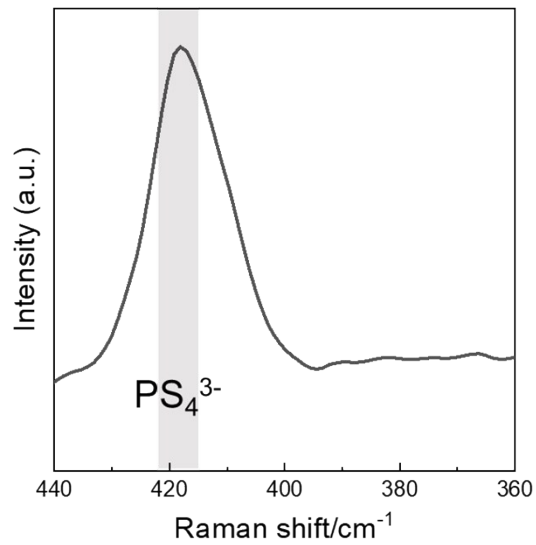

Figure S3. Anisole+Li<sub>2</sub>S+P<sub>2</sub>S<sub>5</sub> raman spectrum after microwave irradiation used a SiC vial.

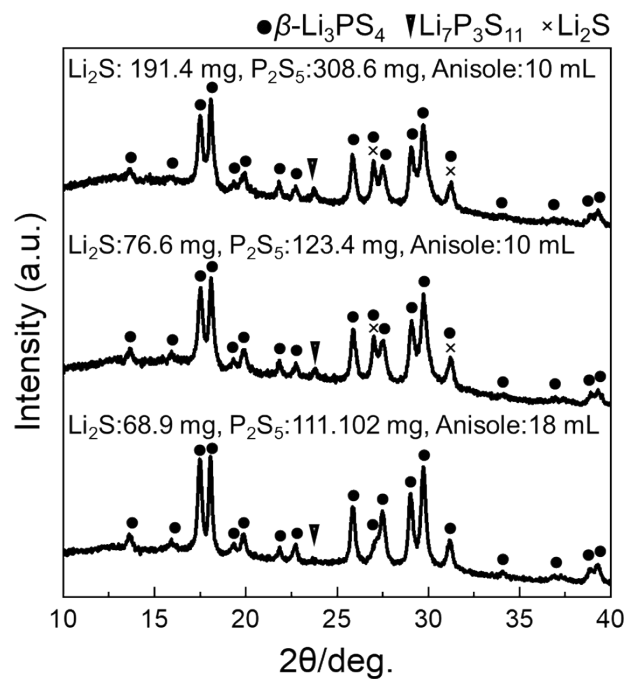

Figure S4. The XRD patterns of the solid electrolytes with varying ratio of reagent to solvent. The ratio of Li<sub>2</sub>S to P<sub>2</sub>S<sub>5</sub> was fixed at 75:25. Ball-milled Li<sub>2</sub>S was used. The microwave irradiation was applied until the temperature reached 220 °C

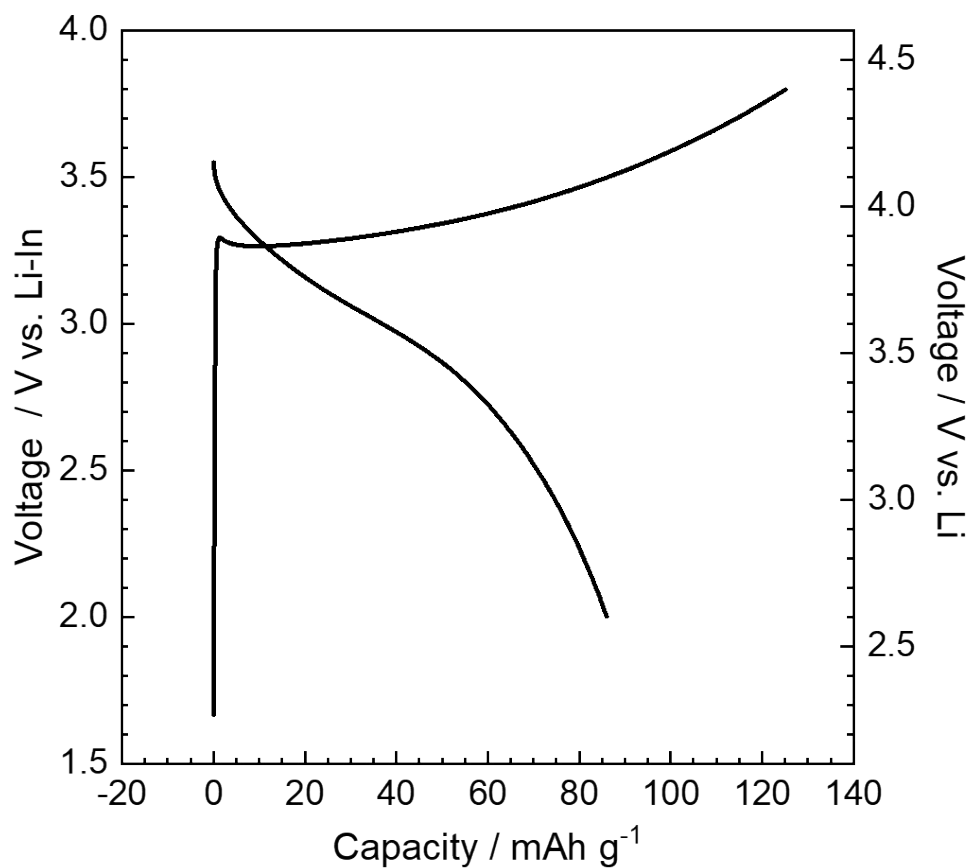

Figure S5 Discharge-charge profile of all-solid-state battery with the cathode composite composed of  $\text{Li}_7\text{P}_3\text{S}_{11}$  synthesized using anisole. The ratio of the composite was  $\text{LiNbO}_3$ -coated  $\text{LiNi}_{1/3}\text{Co}_{1/3}\text{Mn}_{1/3}\text{O}_2$  (NMC): synthesized solid electrolyte: Vapor Grown Carbon Fiber (VGCF) = 69:29:2 (mass %). The battery was fabricated according to the literature [M Calpa, et al., *Electrochimica Acta*, 2019, **219**, 473-480.].

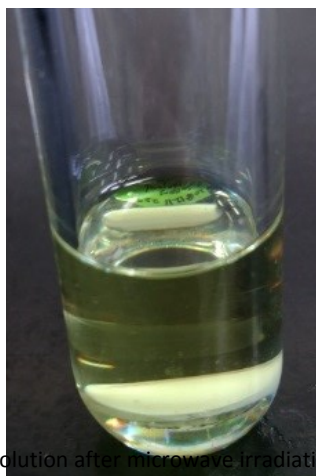

Figure S6. The photo of  $\text{P}_2\text{S}_5$  and anisole solution after microwave irradiation.

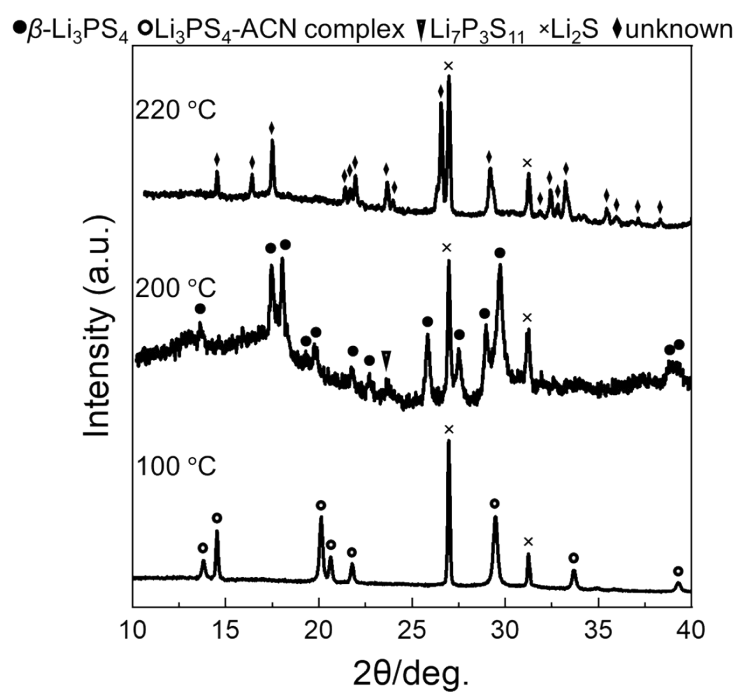

Figure S7. The XRD pattern of the precipitation of suspension ( $\text{Li}_2\text{S}:\text{P}_2\text{S}_5 = 75:25$ ) using ACN after microwave irradiation.

Table S1. Detailed reagent and solvent amounts of Figure 3–5, S2–S4, S6.

| Exp. # | Figure # | Li <sub>2</sub> S (without ball milling)/mg | Li <sub>2</sub> S (with ball milling)/mg | P <sub>2</sub> S <sub>5</sub> /mg | Lawweson's reagents/mg | LiCl/mg | Anisole/mL | ACN/mL | Microwave heating/°C | Post heating/°C |
|--------|----------|---------------------------------------------|------------------------------------------|-----------------------------------|------------------------|---------|------------|--------|----------------------|-----------------|
| 1      | 3        | 68.9                                        | -                                        | 111.1                             | -                      | -       | 18         | -      | 100                  | -               |
| 2      | 3        | 68.9                                        | -                                        | 111.1                             | -                      | -       | 18         | -      | 180                  | -               |
| 3      | 3        | 68.9                                        | -                                        | 111.1                             | -                      | -       | 18         | -      | 200                  | -               |
| 4      | 3        | 68.9                                        | -                                        | 111.1                             | -                      | -       | 18         | -      | 220                  | -               |
| 5      | 3        | 68.9                                        | -                                        | 111.1                             | -                      | -       | 18         | -      | 240                  | -               |
| 6      | 3        | 68.9                                        | -                                        | 111.1                             | -                      | -       | 18         | -      | 260                  | -               |
| 7      | 3        | 68.9                                        | -                                        | 111.1                             | -                      | -       | 18         | -      | 280                  | -               |
| 8      | 3        | 68.9                                        | -                                        | 111.1                             | -                      | -       | 18         | -      | 300                  | -               |
| 9      | 4        | 58.6                                        | -                                        | 121.4                             | -                      | -       | 18         | -      | 260                  | -               |
| 10     | 5        | 68.9                                        | -                                        | 111.1                             | -                      | -       | 18         | -      | 220                  | 200             |
| 11     | 5        | -                                           | 68.9                                     | 111.1                             | -                      | -       | 18         | -      | 220                  | 200             |
| 12     | 5        | 58.6                                        | -                                        | 121.4                             | -                      | -       | 18         | -      | 260                  | 300             |
| 13     | 5        | 85.6                                        | -                                        | 82.8                              | -                      | 31.6    | 14         | -      | 220                  | 180             |
| 14     | 5        | 85.6                                        | -                                        | 82.8                              | -                      | 31.6    | 14         | -      | 220                  | 550             |
| 15     | S2       | 25.6                                        | -                                        | -                                 | 74.6                   | -       | 18         | -      | 300                  | -               |
| 16     | S3       | 23.0                                        | -                                        | 37.0                              | -                      | -       | 6          | -      | 260                  | -               |
| 17     | S4       | -                                           | 68.9                                     | 111.1                             | -                      | -       | 18         | -      | 220                  | 200             |
| 18     | S4       | -                                           | 76.6                                     | 123.4                             | -                      | -       | 10         | -      | 220                  | 200             |
| 19     | S4       | -                                           | 191.4                                    | 308.6                             | -                      | -       | 10         | -      | 220                  | 200             |
| 20     | S6       | 137.8                                       | -                                        | 222.2                             | -                      | -       | -          | 18     | 100                  | -               |
| 21     | S6       | 137.8                                       | -                                        | 222.2                             | -                      | -       | -          | 18     | 200                  | -               |
| 22     | S6       | 137.8                                       | -                                        | 222.2                             | -                      | -       | -          | 18     | 220                  | -               |
